# Supplementary material
Source: HighWire-hosted journal article supplement (http://dmd.aspetjournals.org/highwire/filestream/66629/field_highwire_adjunct_files/0/Supplemental_68593.pdf)
Supplement: Supplemental_68593.pdf [file Supplemental_68593.pdf]

*Supplemental Information for:*

**Hepatic cytochrome P450 activity, abundance, and expression throughout human development**

Natalie C. Sadler, Premchendar Nandhikonda, Bobbie-Jo Webb-Robertson, Charles Ansong, Lindsey N. Anderson, Jordan N. Smith, Richard A. Corley, Aaron T. Wright

Biological Sciences Division, Pacific Northwest National Laboratory, Richland, WA, 99352 USA  
(N.C.S., P.N., C.A., L.N.A., J.N.S., R.A.C., A.T.W.)

Computational and Statistical Analytics Division, Pacific Northwest National Laboratory,  
Richland, WA 99352 USA (B.J.W.R.)

Running Title: **Ontogeny of hepatic cytochrome P450 enzymes**

Corresponding Author:

Aaron T Wright  
[Aaron.Wright@pnnl.gov](mailto:Aaron.Wright@pnnl.gov)  
902 Battelle Blvd  
Box 999, MSIN J4-02  
Richland, WA 99352  
(509) 372-5920 (office)  
(509) 371-7304 (fax)

**Supplemental Table 1.** List of human P450 oligonucleotide premade QuantiTect primer assays from Qiagen.

| Name    | GeneBank accession | Unigene accession | QuantiTect Primer Assays |
|---------|--------------------|-------------------|--------------------------|
| CYP1A1  | NM_000499          | Hs.72912          | Hs_CYP1A1_1_SG           |
| CYP2W1  | NM_017781          | Hs.272795         | Hs_CYP2W1_1_SG           |
| CYP2J2  | NM_000775          | Hs.152096         | Hs_CYP2J2_1_SG           |
| CYP1B1  | NM_000104          | Hs.154654         | Hs_CYP1B1_1_SG           |
| CYP19A1 | NM_031226          | Hs.260074         | HS_CYP19A1_1_SG          |
| CYP7B1  | NM_004820          | Hs.667720         | HS_CYP7B1_1_SG           |
| CYP2S1  | NM_030622          | HS.98370          | HS_CYP2S1_1_SG           |
| CYP2C9  | NM_000771          | Hs.282624         | HS_CYP2C9_1_SG           |
| CYP3A4  | NM_017460          | Hs.728751         | HS_CYP3A4_1_SG           |
| CYP2D6  | NM_000106          | Hs.648256         | HS_CYP2D6_1_SG           |
| CYP4A11 | NM_000778          | Hs.1645           | HS_CYP4A11_1_SG          |
| CYP2E1  | NM_000773          | Hs.12907          | HS_CYP2E1_1_SG           |
| CYP20A1 | NM_177538          | Hs.446065         | HS_CYP20A1_1_SG          |
| CYP2C19 | NM_000769          | Hs.282409         | HS_CYP2C19_1_SG          |
| CYP8B1  | NM_004391          | Hs.447793         | HS_CYP8B1_1_SG           |
| CYP3A7  | NM_000765          | Hs.111944         | HS_CYP3A7_1_SG           |

**Supplemental Table 2. Significant proteins in the global subset**

| Protein     | Direction       | G-test Corrected P-value | % Present TM1 & TM2 | % Present Neonate/Infant & Juvenile & Adult | T-test Corrected P-value | Log2 Fold Change |
|-------------|-----------------|--------------------------|---------------------|---------------------------------------------|--------------------------|------------------|
| <b>4F11</b> | Increase        | <1E015                   | 0                   | 100                                         |                          |                  |
| <b>2A6</b>  | Increase        | 1.1E-13                  | 3.6                 | 100                                         |                          |                  |
| <b>2C19</b> | Increase        | 6.8E-7                   | 3.6                 | 73.9                                        |                          |                  |
| <b>3A5</b>  | Increase        | 2.2E-3                   | 60.7                | 100                                         |                          |                  |
| <b>4V2</b>  | Increase        | 2.2E-3                   | 60.7                | 100                                         |                          |                  |
| <b>4F22</b> | <i>Increase</i> | <i>0.10(p=3.0E-3)</i>    | <i>0</i>            | <i>21.7</i>                                 |                          |                  |
| <b>2C8</b>  | Increase        | 1.1E-13                  | 3.6                 | 100                                         | 5.7E-4                   | 7.84             |
| <b>2C9</b>  | Increase        | 1.8E-12                  | 7.1                 | 100                                         | 1.6E-13                  | 10.02            |
| <b>2B6</b>  | Increase        | 5.3E-9                   | 21.4                | 100                                         | 0.02                     | 4.23             |
| <b>2E1</b>  | Increase        | 4.1E-7                   | 32.1                | 100                                         | 2.3E-19                  | 10.19            |
| <b>2D6</b>  | Increase        | 3.4E-4                   | 53.6                | 100                                         | 2.7E-17                  | 8.87             |
| <b>4F2</b>  | Increase        |                          |                     |                                             | 2.4E-11                  | 4.21             |
| <b>1A2</b>  | Increase        |                          |                     |                                             | 3.1E-11                  | 3.64             |
| <b>3A4</b>  | Increase        |                          |                     |                                             | 2.3E-10                  | 4.81             |
| <b>27A1</b> | Increase        |                          |                     |                                             | 3.7E-9                   | 3.51             |
| <b>8B1</b>  | Increase        |                          |                     |                                             | 4.3E-9                   | 2.89             |
| <b>20A1</b> | Increase        |                          |                     |                                             | 0.03                     | 1.55             |
| <b>2J2</b>  | Increase        |                          |                     |                                             | 0.04                     | 2.12             |
| <b>4F3</b>  | <i>Increase</i> |                          |                     |                                             | <i>0.21(p=9.2E-3)</i>    | <i>0.96</i>      |
| <b>4F12</b> | <i>Increase</i> |                          |                     |                                             | <i>0.86(p=0.04)</i>      | <i>1.03</i>      |
| <b>7B1</b>  | <i>Decrease</i> |                          |                     |                                             | <i>0.29(p=0.01)</i>      | <i>-1.14</i>     |
| <b>3A7</b>  | Decrease        |                          |                     |                                             | 7.3E-10                  | -6.85            |
| <b>51A1</b> | Decrease        |                          |                     |                                             | 7.4E-14                  | -3.66            |
| <b>19A1</b> | Decrease        | 1.1e-13                  | 96.4                | 0                                           |                          |                  |

**Supplemental Table 3. Significant proteins in the ABPP subset**

| Protein     | Direction       | G-test Corrected P-value | % Present TM1 & TM2 | % Present Neonate/Infant & Juvenile & Adult | T-test Corrected P-value | Log2 Fold Change |
|-------------|-----------------|--------------------------|---------------------|---------------------------------------------|--------------------------|------------------|
| <b>2C9</b>  | Increase        | <1E015                   | 0                   | 100                                         |                          |                  |
| <b>2C8</b>  | Increase        | 8.8E-14                  | 3.6                 | 100                                         |                          |                  |
| <b>1A2</b>  | Increase        | 1.4E-8                   | 3.6                 | 82.6                                        |                          |                  |
| <b>2D6</b>  | Increase        | 1.9E-7                   | 10.7                | 87.0                                        |                          |                  |
| <b>2A6</b>  | Increase        | 2.6E-5                   | 0                   | 52.2                                        |                          |                  |
| <b>2C19</b> | Increase        | 2.6E-5                   | 0                   | 52.2                                        |                          |                  |
| <b>2E1</b>  | Increase        | 4.7E-5                   | 35.7                | 95.7                                        |                          |                  |
| <b>2B6</b>  | Increase        | 3.2E-4                   | 0                   | 43.5                                        |                          |                  |
| <b>3A5</b>  | Increase        | 1.7E-4                   | 10.7                | 65.2                                        |                          |                  |
| <b>4F11</b> | Increase        | 1.7E-4                   | 3.6                 | 52.3                                        |                          |                  |
| <b>27A1</b> | Increase        | 2.9E-3                   | 35.7                | 87.0                                        |                          |                  |
| <b>4V2</b>  | <i>Increase</i> | <i>0.15 (p=6.5E-3)</i>   | 3.6                 | 30.4                                        |                          |                  |
| <b>2J2</b>  | <i>Increase</i> | <i>0.32 (p=0.01)</i>     | 50.0                | 82.6                                        |                          |                  |
| <b>4F12</b> | <i>Decrease</i> | <i>0.27(p=0.01)</i>      | 17.9                | 0                                           |                          |                  |
| <b>4A11</b> | <i>Decrease</i> |                          |                     |                                             | 0.06(p=4E-3)             | -3.17            |
| <b>51A1</b> | Decrease        |                          |                     |                                             | 2.7E-4                   | -4.59            |
| <b>3A7</b>  | Decrease        |                          |                     |                                             | 6.4E-6                   | -5.73            |
| <b>19A1</b> | Decrease        | 2.8E-4                   | 46.4                | 0                                           |                          |                  |

**Supplemental Figure 1.** Comparison of P450 protein abundance to ABPP measured functional activity. Activity and protein expression values are averaged by life stage, and normalized on a 0-1 scale for each individual P450. Thereby, points of highest expression or activity for each P450 are observed as increasingly red. TM1 – fetal first trimester; TM2 – fetal second trimester. See also Figure 5 in the manuscript.

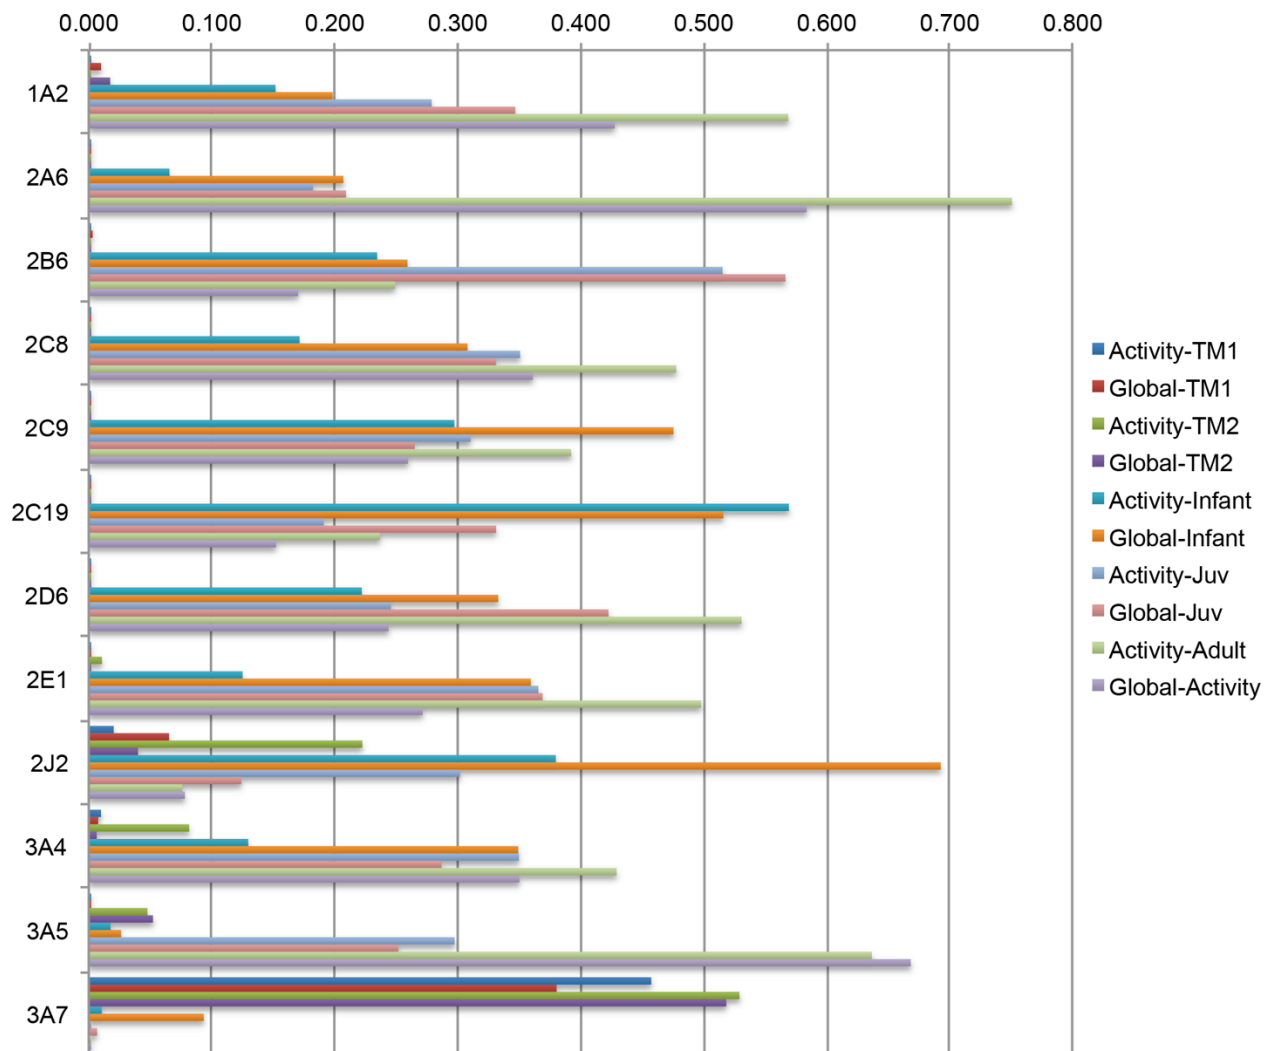

## **Supplemental Dataset Descriptions**

**Dataset 1.** Sample metadata. Availability of sample information is quite disparate.

**Dataset 2.** Global proteomics statistics values as determined by approaches described in the Materials and Methods section of the manuscript.

**Dataset 3.** Activity-based protein profiling proteomics statistics values as determined by approaches described in the Materials and Methods section of the manuscript.

**Dataset 4.** Transformed qRT-PCR values showing the fold-change of expression to an internal housekeeping gene, GAPDH. Data corresponds with Figure 2 in the manuscript. Gest. day = gestational day.

**Dataset 5.** Raw qRT-PCR values.

**Dataset 6.** Transformed qRT-PCR values showing the fold-change of expression to an internal housekeeping gene, beta-actin. Gest. day = gestational day.

**Dataset 7.** Global proteomics accurate mass and time (AMT) tag abundance values for P450 protein expression. Missing values are imputed as one-half the minimum measured value. TM – trimester, FL – fetal, AL – adult.

**Dataset 8.** Individual peptide AMT tag values for P450 protein expression. TM – trimester, FL – fetal, AL – adult.

**Dataset 9.** AMT tag abundance values for P450 functional activity as determined by activity-based protein profiling (ABPP). Missing values are imputed as one-half the minimum measured value. TM – trimester, FL – fetal, AL – adult.

**Dataset 10.** Individual peptide AMT tag values for ABPP determined abundance. TM – trimester, FL – fetal, AL – adult.
